1 **Title:** Mitochondria, mutations and sex: a new hypothesis for the evolution of sex based on  
2 mitochondrial mutational erosion

3  
4 **Subtitle:** Mitochondrial mutational erosion in ancestral eukaryotes would favour the evolution of  
5 sex, harnessing nuclear recombination to optimize compensatory nuclear coadaptation

6  
7 Authors: Justin C. Havird<sup>1,2</sup> (corresponding author: Justin.Havird@colostate.edu)  
8 Matthew D. Hall<sup>3</sup>  
9 Damian K. Dowling<sup>3</sup>

10

11 <sup>1</sup>Dept. of Biological Sciences, Auburn University, Auburn, AL 36849, USA

12 <sup>2</sup>Biology Dept., Colorado State University, Fort Collins, CO 80523, USA

13 <sup>3</sup>School of Biological Sciences, Monash University, Victoria 3800, Australia

14

15 **Note: This article has yet to be formally peer reviewed or editorially handled. It has not**  
16 **undergone peer review or editorial assessment/editing.**

17

## 18 **Summary**

19

20 The evolution of sex in eukaryotes represents a paradox, given the “two-fold” fitness cost it  
21 incurs. We hypothesize that the mutational dynamics of the mitochondrial genome would have  
22 favoured the evolution of sexual reproduction. Mitochondrial DNA (mtDNA) exhibits a high  
23 mutation rate across most eukaryote taxa, and several lines of evidence suggest this high rate is  
24 an ancestral character. This seems inexplicable given mtDNA-encoded genes underlie the  
25 expression of life’s most salient functions, including energy conversion. We propose that  
26 negative metabolic effects linked to mitochondrial mutation accumulation would have invoked  
27 selection for sexual recombination between divergent host nuclear genomes in early eukaryote  
28 lineages. This would provide a mechanism by which recombinant host genotypes could be  
29 rapidly shuffled and screened for the presence of compensatory modifiers that offset mtDNA-  
30 induced harm. Under this hypothesis, recombination provides the genetic variation necessary for  
31 compensatory nuclear coadaptation to keep pace with mitochondrial mutation accumulation.

32

33

34 **Introduction: The evolution of sex and the evolution of mitochondria are intrinsically**  
35 **linked**

36

37 Widespread sexual reproduction among eukaryotes is puzzling from an evolutionary standpoint,  
38 because sex carries a “two-fold” fitness cost, and must therefore offer a benefit that surpasses  
39 this cost [1]. Several plausible models of the evolution of sex have been proposed, based on the  
40 benefits of recombination with sex, including facilitating the purging of deleterious mutations  
41 from the nuclear genome [2] or adaptation to ecological hazards such as parasites or  
42 environmental fluctuations [3]. However, while experimental and theoretical support exists for  
43 each of these classes of models, they arguably remain limited in their capacity to explain certain  
44 fundamental questions: why have all eukaryotes, but no prokaryotes, evolved life-history  
45 strategies hinged on sexual reproduction; and why has obligate sexual reproduction become so  
46 prevalent amongst certain eukaryotes (e.g., most metazoans), while other taxa (e.g., plants and  
47 certain metazoan lineages) exhibit more flexible reproductive systems based on facultative sex  
48 interspersed with clonal reproduction?

49 Eukaryotes are bound by two basal features. They all have – or have had during their  
50 evolutionary histories – energy-converting organelles called mitochondria [4]; and they all have  
51 – or have had – the ability to reproduce sexually [5]. We propose that the origins of this ancient  
52 association can be traced to the mutational properties of the mitochondrion’s own (mt)DNA. The  
53 mitochondria are integral to eukaryote evolution, and the ancient endosymbiosis that led to the  
54 mitochondrion provided the eukaryotes with a highly efficient form of energy conversion,  
55 presumably catalyzing the evolution of complex life [6]. However, mitochondria retain a small  
56 genome, which is destined to accumulate mutations via Muller’s Ratchet as a consequence of the  
57 genome’s evolutionary constraints and high mtDNA mutation rate across the eukaryote  
58 phylogeny [7,8] (with few exceptions, such as the derived slow mutation rate of many land  
59 plants). Furthermore, across the eukaryote domain, de novo mutations in the mtDNA exhibit a  
60 higher fixation probability than those in the nuclear DNA [9]. This leads to a striking paradox – a  
61 genome that wields a salient hand in maintaining the integrity of complex life, is prone to  
62 perpetual mutational erosion across large branches of the eukaryote phylogeny.

63 Here, we outline a new hypothesis that can reconcile this paradox. We propose that  
64 mitochondrial genomic mutation accumulation (hereafter termed “mito-mutation accumulation”)  
65 is likely to have represented one of the original drivers of the evolution of sexual reproduction in  
66 eukaryotes. We contend that during the early evolution of eukaryotes, mito-mutation  
67 accumulation would have placed strong selection on the host genome for compensatory modifier  
68 mutations to offset the negative metabolic effects linked to deleterious mtDNA mutations.  
69 Recombination between distinct host ‘nuclear’ genotypes, achievable via sexual reproduction,  
70 would facilitate such a compensatory response, by accelerating the rate by which alleles at host  
71 nuclear loci could be shuffled and screened for compensatory function.

72 Below, we outline our case, which is built on a strong base of experimental studies that  
73 have elucidated how compensatory mitochondrial-nuclear (mito-nuclear) coevolution is key to  
74 maintaining organismal viability. We highlight evidence for nuclear compensatory adaptation to  
75 pathogenic mtDNA mutations, and discuss how mito-nuclear coevolution is greatly facilitated by  
76 recombination in the nuclear genome. We then identify the key assumptions on which our  
77 hypothesis rests, and present supporting evidence for each assumption. We discuss the  
78 hypothesis in the context of other evolutionary theories that have previously drawn links between  
79 the mitochondria and sex in eukaryotes. Finally, we conclude by noting that the power of our  
80 hypothesis lies in its testability; it provides a series of predictions amenable to experimental  
81 enquiry, whose answers could provide compelling support for the contention that mito-mutation  
82 accumulation was a key driver of the evolution of sex in eukaryotes.

83

#### 84 **Experimental support for the role of compensatory nuclear adaptation to mito-mutation** 85 **accumulation**

86

87 Preserving the fine-scale interactions between proteins encoded by both mitochondrial and  
88 nuclear genomes is critical for maintaining oxidative phosphorylation (OXPHOS) and meeting  
89 the energy needs of the contemporary eukaryotic cell. Paradoxically, the mtDNA is prone to  
90 perpetually accumulate deleterious mutations [10], which could have fatal consequences for  
91 organismal function in the absence of a compensatory nuclear response [11-16]. Indeed, it is now  
92 well known that mutations in the mtDNA sequence are often tied to the onset of metabolic  
93 diseases, early ageing, and infertility [17,18]. Moreover, an increased penetrance of such

94 ailments, and a general reduction in fitness, has been observed upon artificially disrupting  
95 coevolved combinations of mito-nuclear genotypes, by expressing mtDNA haplotypes alongside  
96 evolutionary novel nuclear backgrounds [19,20]. In model systems like *Mus* and *Drosophila*,  
97 such mito-nuclear “mismatches” have resulted in reduced metabolic functioning and lower  
98 fitness [16,21-23]. These results strongly suggest that, within any given population,  
99 mitochondrial and nuclear gene combinations are co-evolutionarily “matched” to one another. It  
100 follows that mito-nuclear coevolution may contribute to driving reproductive isolation between  
101 incipient populations, and that this might ultimately lead to speciation [12,24].

102         Other support for the role of mito-nuclear coevolution in maintaining organismal viability  
103 comes from studies reporting elevated substitution rates in nuclear-encoded genes that interact  
104 with mtDNA-encoded products, relative to their nuclear counterparts that interact with other  
105 nuclear-encoded genes [25-27]. These findings are important because they indicate a key role for  
106 positive selection in shaping the genetic architecture of nuclear-encoded genes involved in  
107 mitochondrial function in order to compensate for mtDNA mutations. Given the products of  
108 these nuclear genes are entwined in tightly regulated mito-nuclear interactions, this suggests that  
109 these nuclear genes are responding quickly and efficiently to mito-mutation accumulation, via  
110 counter-adaptations of compensatory function to ensure the integrity of metabolic function  
111 [25,28].

112         The empirical evidence outlined above suggests that nuclear compensatory adaptations  
113 have commonly evolved to mitigate the effects of mito-mutation accumulation and prevent  
114 mtDNA-mediated Muller’s Ratchet effects from leading to widespread lineage extinctions across  
115 the eukaryote phylogeny. Recombination in the host genome would have greatly facilitated this  
116 compensatory response, by shuffling and generating unique nuclear allelic combinations every  
117 generation, providing the genetic variation required for selection to screen for nuclear  
118 adaptations that offset mitochondrial mutational erosion (Fig. 1). In early eukaryotes, while  
119 horizontal gene transfer from other host nuclear lineages might have partially alleviated the  
120 effects of mito-mutation accumulation, we contend that a more predictable and rapid mechanism  
121 of gene mixing would have been required to cope with the perpetual mutational pressure  
122 imposed by the mitochondrial genome during this time (Fig. 1). Recombination via sex could  
123 provide such a mechanism, enabling compensatory nuclear alleles to spread quickly into new  
124 genetic backgrounds, offsetting Hill-Robertson effects [29], and ensuring the modifiers were not

125 placed on nuclear genomic backgrounds that are largely deleterious in performance and hence  
126 purged under background selection.

127

## 128 **Key assumptions**

129

130 Our hypothesis centres on two assumptions, each of which are plausible and which have been  
131 made previously by evolutionary biologists. We outline the substantiating evidence for each  
132 below. Furthermore, we note that while there are exceptions to each of these assumptions, it is  
133 these very exceptions that provide excellent opportunities on which our hypothesis can be tested  
134 (see Predictions).

135

### 136 Assumption 1: The high mutation rate of the mtDNA is an ancestral condition

137

138 We assume that the high mutation rate of mtDNA, which is a hallmark of the streamlined  
139 mitochondrial genomes of metazoans [30], is a character that was shared by ancestral  
140 mitochondria during early eukaryote evolution and the progression of endosymbiosis [31]. Six  
141 lines of evidence support this assumption. First, recent studies have identified unicellular and  
142 early-diverging eukaryotic lineages (e.g., haptophyte and stramenopile algae) that similarly show  
143 elevated mtDNA mutation rates, suggesting that across eukaryotes as a whole there is a  
144 propensity for mtDNA evolutionary rates to outstrip those in the nucleus [7,8,32]. Fungi and  
145 yeast species also conform to these high mtDNA mutation rates relative to nuclear rates [33-35],  
146 indicating that elevated mtDNA mutation is not restricted to animals. Together, these data  
147 suggest that a high mutation rate is likely to have been shared by the eukaryotic ancestor, and  
148 that the low mtDNA mutation rate of many land plants is a derived condition. Indeed, studies  
149 have emerged that demonstrate low mtDNA mutation rates are not systematic of all land plants,  
150 and many such species show incredible variation in the mtDNA mutation rate, including some of  
151 the highest ever documented rates recorded in eukaryotes [36,37].

152 Second, other recent cellular endosymbionts likewise exhibit elevated mutation rates  
153 compared with the genomes of their hosts, suggesting that during endosymbiosis the ancestral  
154 mitochondria would have also experienced increased mutation rates [38,39]. Third, rates of  
155 substitution appear to be faster in bacteria, which gave rise to the mitochondrial genome, than in

156 archaea, which gave rise to a majority of the nuclear genome [40]. Fourth, the well-documented  
157 presence of a “long-branch” leading from the bacterial ancestor to the mtDNA of modern  
158 eukaryotes (including plants) suggests a rapid increase in mutation rate in the mtDNA of early  
159 eukaryotes following endosymbiosis [41], further supporting the conclusion that the slow-  
160 evolving mtDNA of plants is a derived characteristic. Fifth, we note that the mtDNA resides  
161 within the mitochondria – a highly mutagenic site that is the major source of reactive oxygen  
162 species in the cell due to its redox activity. Reactive oxygen species production also increases  
163 during ageing and is correlated with compromised mitochondrial function [42]. Finally, given  
164 that mtDNA replicates more often than the nuclear DNA per cell cycle [43], replication errors  
165 should be more prevalent in the mtDNA, leading to an increased mutation rate [18] across the  
166 eukaryote phylogeny.

167

168 Assumption 2: Fundamental evolutionary constraints limit the mtDNA itself from evolving bi-  
169 parental transmission

170

171 Across eukaryotes, uniparental inheritance of the mitochondria remains a ubiquitous pattern,  
172 with only a few exceptions [44]. Our hypothesis assumes the mtDNA was under strong  
173 evolutionary constraints to avoid bi-parental transmission, as its host transitioned to sexual  
174 reproduction with two sexes. We acknowledge that there is considerable flexibility in mtDNA  
175 recombination rates across eukaryotes, particularly in land plants and in fungi. However, intra-  
176 individual heteroplasmy of divergent mtDNA molecules in plants is rarely reported to be caused  
177 by paternal leakage (as a consequence of sexual reproduction), and uniparental transmission of  
178 mtDNA remains the typical pattern in in these lineages [45]. This is similarly the case for fungi  
179 [46], which show heteroplasmy in early life stages, but revert to homoplasmy as they develop  
180 [45]. Even in these taxa in which recombination of mtDNA has been recorded [45], they  
181 maintain uniparental inheritance of the mtDNA, which would presumably reduce the scope by  
182 which recombination could act to purge poorly performing mtDNA molecules. Genetically  
183 effective recombination between mtDNA molecules requires bi-parental transmission. In the  
184 absence of biparental transmission, any two mtDNA molecules would share near-identical  
185 sequences, and so too would the products of their recombination [43].

186           The assumption that fundamental evolutionary constraints prevented the evolution of  
187 biparental mitochondria transmission has received robust support from population genetic theory  
188 [47-50], as well as empirical work [51,52]. Population genetic models have demonstrated that  
189 biparental transmission would lead to divergent mtDNA molecules competing within the same  
190 host, and promote selection for selfish molecules that replicate faster at the expense of host  
191 metabolic efficiency [47-50]. Exploring these conditions, experimental studies in yeast and mice  
192 have shown that heteroplasmy leads to competition between divergent mtDNA genomes and a  
193 breakdown in fundamental metabolic functions such as respiration, nutrient intake, and even  
194 cognitive impairment [51,52]. Additionally, maintaining uniparental inheritance allows for  
195 mtDNA to be sequestered in a metabolically quiescent germ-line, which allows resulting  
196 offspring to avoid inheriting a damaged mtDNA genome associated with a metabolically active  
197 cell (e.g., sperm cells) [44,53,54].

198           Finally, while prokaryotes rely on horizontal gene exchange as a facilitator of adaptation,  
199 we assume this level of gene-mixing would not have sufficed the evolving eukaryote.  
200 Transitioning to life as a highly complex cell, and harnessing the efficient energy conversion  
201 provided by the mitochondria, is predicted to have led to a rapid expansion in nuclear genome  
202 size [6]. As the nuclear genome expanded, however, horizontal gene transfer would have  
203 affected a smaller and smaller fraction of the nuclear genome, diminishing the capacity of this  
204 process to reliably provide the raw genetic variation needed to screen for compensatory nuclear  
205 modifiers. Indeed, only one asexual eukaryotic lineage, the bdelloid rotifers, is believed to  
206 experience a large amount of horizontal gene transfer as a possible substitute for sex [55]. Yet  
207 rotifers also have high rates of gene conversion and expanded numbers of genes for oxidative  
208 resistance [56], suggesting that the lack of recombination in eukaryotes is exceedingly rare  
209 because multiple mechanisms, and a very specific genetic architecture, is required to supplement  
210 horizontal gene transfer.

211

### 212 **Previous links between mitochondria and the evolution of sex**

213 A link between mitochondria and sex [6,49,50,57-59] has been suggested in previous studies, but  
214 these have typically assumed gamete fusion (i.e, sex) was already in place at the time of  
215 acquisition of the mitochondrion. Here, the evolution of two different sexes – one that transmits  
216 the mitochondria (the female), and one that does not (the male) – mitigates the selfish conflict



217 between divergent mtDNA molecules of different parents, by maintaining uniparental mtDNA  
218 transmission [49,50,58,59] (see Assumption 2 above). None of these studies envisioned that  
219 acquisition of the mitochondrion, in early eukaryote evolution, was a driving force behind the  
220 evolution of sex *per se*. Only one other viewpoint has previously proposed a link between  
221 recombination and mitochondria, albeit with a different process mediating the evolution of sex  
222 [57]. Lane [57] suggested the early mitochondrion in the evolving eukaryote would provide an  
223 unending source of foreign DNA that would have contaminated the nuclear genome, and this  
224 contamination of foreign DNA would have imposed selection for recombination between host  
225 genotypes to preserve nuclear chromosomes with beneficial mutations, while purging deleterious  
226 ones. This view is supported by evidence that introns in the nuclear genome are of mitochondrial  
227 origin [60]. Lane and Martin [6,61] also hypothesized that the expansion of nuclear genome size,  
228 facilitated by the mitochondrion, would have favoured a shift from unreliable lateral gene  
229 transfer to the more robust sexual recombination [6].

230 Our hypothesis differs from those of predecessors by proposing that the selection for sex  
231 and nuclear recombination in eukaryotes came from mutational meltdown within the  
232 mitochondrial genome itself. By recognizing that mitochondrial mutations are particularly  
233 consequential because they are more often fixed than nuclear mutations [9], and because they  
234 affect one of eukaryote life's core functions – energy conversion, we extend the Fisher-Muller  
235 model of recombination to include the fixation of beneficial modifiers that together act to offset  
236 the effects of mito-mutation accumulation [62]. Moreover, we note that parasite-mediated  
237 theories of sexual reproduction [3] have clear parallels to our hypothesis, given that the ancestral  
238 mitochondria can reasonably be envisaged as endosymbiotic parasites. As with any complex  
239 inter-species interaction [63], early eukaryotic-mitochondrial symbiosis may have been marked  
240 by pervasive inter-genomic conflict, signatures of which are still manifest in contemporary  
241 eukaryote lineages (e.g. cytoplasmic male sterility in plants [64]). Thus, in addition to the rapid  
242 accumulation of mito-mutations, early eukaryotic-mitochondrial conflict might conceivably have  
243 selected for mutations that benefited the mitochondria, at the expense of host fitness, further  
244 promoting the evolution of recombination in the host nuclear genome to enable an efficient  
245 response to the evolving mtDNA.

246 Although formation of chimeric OXPHOS complexes between mitochondrial and nuclear  
247 proteins would have greatly spurred the need for exquisite mito-nuclear compatibility [15,16,65],



248 we believe that the evolutionary transition to sexual reproduction in order to maintain mito-  
249 nuclear compatibility is very likely to have pre-dated the origin of OXHPOS complexes. Parts of  
250 the metabolic machinery of eukaryotes would have required intimate inter-genomic coordination  
251 to achieve mutual endosymbiosis, long before OXPHOS-encoding genes translocated over to the  
252 nuclear genome. For example, the nuclear-encoded genes involved in importing raw materials  
253 from outside of the host and into the mitochondria, would presumably have needed to co-evolve  
254 with mtDNA-encoded genes involved in converting and utilizing such materials. Indeed, we  
255 contend that it was the transition to host nuclear recombination and sex that would have provided  
256 the large selective advantage for translocated mtDNA genes to move over *en masse* and remain  
257 in the nucleus (Fig. 2), resulting in the greatly streamlined mito-genomes of eukaryotes  
258 compared to their bacterial ancestors.

259

### 260 **Testable predictions and future experiments**

261 There are several testable predictions that stem from our hypothesis. First, we predict that  
262 eukaryote taxa with lower mtDNA mutation rates should exhibit lower propensities for sexual  
263 reproduction. Although mtDNA mutates quickly in most animal lineages, some (e.g., Cnidaria)  
264 have slowly-evolving mtDNA [66], and Angiosperms in general also have slowly-evolving  
265 mtDNA [8]. Under our hypothesis, the magnitude of mtDNA-mediated selection for  
266 compensatory nuclear modifiers should be lower in these lineages. cursory evidence suggests  
267 obligate sexual reproduction and outcrossing are relatively rare in both lineages [67,68],  
268 supporting the prediction that lineages with low mtDNA mutation rates should not have to rely  
269 as heavily on sexual reproduction to offset mtDNA-induced harm. We would expect this  
270 correlation to extend across diverse eukaryotic lineages.

271 A second prediction can be derived based on the rate of paternal leakage of mtDNA, and  
272 associated recombination, across eukaryotes. Although mtDNA is overwhelmingly transmitted  
273 through the maternal lineage in eukaryotes, rare cases have been documented of paternal mtDNA  
274 also being transmitted, suggesting recombination between mtDNA genomes to prevent mito-  
275 mutation accumulation might be possible over evolutionary timescales in some lineages [44].  
276 Those lineages in which leakage of mtDNA from the paternal parent is prevalent should be able  
277 to resort to this mechanism in part to offset their mitochondrial mutation loads, as suggested  
278 previously [44,69]. Based on our hypothesis, it follows that species with appreciable levels of

279 parental mtDNA leakage should also be less likely to exhibit modes of obligate sexual  
280 reproduction.

281 Third, experimental disruption of coevolved mito-nuclear genotypes in facultatively  
282 sexual species should induce elevated rates of sexual reproduction in these species. Experimental  
283 mismatching of coevolved mito-nuclear genotypes, achieved by pairing the prevailing mtDNA  
284 haplotype of a population or species alongside an evolutionary novel nuclear genome sourced  
285 from a separate population/species, has been shown to decrease organismal fitness and modify  
286 patterns of gene expression [16,19-23,70,71], but has never previously been harnessed to study  
287 the propensity for sexual reproduction. Here, the assumption is that the creation of mito-nuclear  
288 mismatches will promote individuals to resort to sex to harness the benefits of recombination  
289 between divergent host nuclear genotypes, to optimize selection for counter-adaptations that  
290 restore mito-nuclear compatibility.

291 Finally, under the assumption that the nuclear-encoded genes that directly interact with  
292 those encoded by the mtDNA are more likely to host compensatory mutations, these nuclear-  
293 encoded genes are predicted to exhibit elevated recombination rates relative to other nuclear  
294 genes that are not involved in mito-nuclear interactions. As we noted above, there is already  
295 evidence that nuclear gene products that interact with mtDNA-encoded products evolve more  
296 quickly based on studies of primates, copepods and plants, supporting this prediction [25-27].  
297 Recent technological developments enabling deep-sequencing to identify recombination “hot  
298 spots” across the nuclear genome [72] could be used to directly gauge recombination levels in  
299 mitochondrial interacting genes relative to those that do not interact with the mitochondria.

300

## 301 **Conclusions**

302 We have presented a new hypothesis for the evolution and maintenance of sexual reproduction.  
303 This hypothesis draws on a robust foundation of empirical evidence that has substantiated the  
304 evolutionary consequences of mito-mutation accumulation, and the role of mito-nuclear  
305 interactions in population coevolutionary processes. Backed by this evidence, we note that the  
306 mitochondrial genome – a universal feature of all organisms equipped for sexual reproduction –  
307 is destined to accumulate mutations. We posit that this would have invoked selection in the  
308 ancestral eukaryote for a mechanism that would facilitate the rapid screening of new  
309 combinations of nuclear genotype, for those exhibiting compensatory function to offset this

310 mitochondrially-induced harm. We propose that this selection pressure was a catalyst for the  
311 evolution of sexual reproduction, since sex, when combined with recombination, would provide  
312 the abundant novel genetic variation necessary for selection to evaluate genotypes of  
313 compensatory effect. The power of our hypothesis lies in its testability. The predictions that we  
314 have outlined are readily amenable to scientific testing. This can be achieved through  
315 experimental studies in modern eukaryote lineages that directly evaluate whether mito-nuclear  
316 genomic mismatches can be alleviated and restored via sexual recombination, as well as by  
317 correlative studies examining mutational characteristics of mitochondrial and nuclear genomes.  
318 Our hypothesis, which links mtDNA mutation rates and mito-nuclear conflict to the propensity  
319 for sex, offers an empirically tractable solution to an enduring problem in biology.

320

### 321 **Acknowledgements**

322 We thank Daniel Sloan, Rachel Muller and their lab groups at CSU and the Mitonuclear  
323 Ecology discussion class at Auburn University for stimulating discussion of this work.

324 DKD/MDH were funded by the Australian Research Council. The authors declare no conflicts of  
325 interest.

326

### 327 **References**

- 328 1 **Maynard Smith J.** 1978. *The Evolution of Sex*: Cambridge University Press.
- 329 2 **Mueller HJ.** 1932. Some genetic aspects of sex. *Am Nat* **66**: 118–38.
- 330 3 **Hamilton WD, Axelrod R, Tanese R.** 1990. Sexual reproduction as an adaptation to  
331 resist parasites (a review). *Proc Natl Acad Sci U S A* **87**: 3566-73.
- 332 4 **Gray MW.** 2012. Mitochondrial evolution. *Cold Spring Harb Perspect Biol* **4**: a011403.
- 333 5 **Cooper MA, Adam RD, Worobey M, Sterling CR.** 2007. Population genetics provides  
334 evidence for recombination in *Giardia*. *Curr Biol* **17**: 1984-8.
- 335 6 **Lane N.** 2014. Bioenergetic constraints on the evolution of complex life. *Cold Spring*  
336 *Harbor Perspectives in Biology* **6**.
- 337 7 **Smith DR, Hua JM, Lee RW, Keeling PJ.** 2012. Relative rates of evolution among the  
338 three genetic compartments of the red alga *Porphyra* differ from those of green plants  
339 and do not correlate with genome architecture. *Molecular Phylogenetics and Evolution*  
340 **65**: 339-44.

- 341 8 **Smith DR, Keeling PJ.** 2015. Mitochondrial and plastid genome architecture:  
342 Reoccurring themes, but significant differences at the extremes. *Proc Natl Acad Sci U S*  
343 *A*. Epub ahead of print.
- 344 9 **Lynch M, Blanchard JL.** 1998. Deleterious mutation accumulation in organelle  
345 genomes. *Genetica* **102-103**: 29-39.
- 346 10 **Lynch M.** 1997. Mutation accumulation in nuclear, organelle, and prokaryotic transfer  
347 RNA genes. *Mol Biol Evol* **14**: 914-25.
- 348 11 **Frank SA, Hurst LD.** 1996. Mitochondria and male disease. *Nature* **383**: 224.
- 349 12 **Burton RS, Barreto FS.** 2012. A disproportionate role for mtDNA in Dobzhansky-  
350 Muller incompatibilities? *Mol Ecol* **21**: 4942-57.
- 351 13 **Burton RS, Ellison CK, Harrison JS.** 2006. The sorry state of F2 hybrids:  
352 consequences of rapid mitochondrial DNA evolution in allopatric populations. *Am Nat*  
353 **168 Suppl 6**: S14-24.
- 354 14 **Burton RS, Pereira RJ, Barreto FS.** 2013. Cytonuclear genomic interactions and  
355 hybrid breakdown. *Ann Rev Ecol Evol Syst* **44**: 281-302.
- 356 15 **Rand DM, Haney RA, Fry AJ.** 2004. Cytonuclear coevolution: the genomics of  
357 cooperation. *Trends Ecol Evol* **19**: 645-53.
- 358 16 **Wolff JN, Ladoukakis ED, Enriquez JA, Dowling DK.** 2014. Mitonuclear interactions:  
359 evolutionary consequences over multiple biological scales. *Philos Trans R Soc Lond B*  
360 *Biol Sci* **369**: 20130443.
- 361 17 **Wallace DC.** 1992. Diseases of the mitochondrial DNA. *Annu Rev Biochem* **61**: 1175-  
362 212.
- 363 18 **Dowling DK.** 2014. Evolutionary perspectives on the links between mitochondrial  
364 genotype and disease phenotype. *Biochim Biophys Acta* **1840**: 1393-403.
- 365 19 **Reinhardt K, Dowling DK, Morrow EH.** 2013. Medicine. Mitochondrial replacement,  
366 evolution, and the clinic. *Science* **341**: 1345-6.
- 367 20 **Morrow EH, Reinhardt K, Wolff JN, Dowling DK.** 2015. Risks inherent to  
368 mitochondrial replacement. *EMBO Rep*. Epub ahead of print
- 369 21 **Nagao Y, Totsuka Y, Atomi Y, Kaneda H, et al.** 1998. Decreased physical  
370 performance of congenic mice with mismatch between the nuclear and the mitochondrial  
371 genome. *Genes & Genetic Systems* **73**: 21-7.

- 372 22 **Yee WKW, Sutton KL, Dowling DK.** 2013. In vivo male fertility is affected by  
373 naturally occurring mitochondrial haplotypes. *Current Biology* **23**: R55-R6.
- 374 23 **Sackton TB, Haney RA, Rand DM.** 2003. Cytonuclear coadaptation in *Drosophila*:  
375 Disruption of cytochrome c oxidase activity in backcross genotypes. *Evolution* **57**: 2315-  
376 25.
- 377 24 **Gershoni M, Templeton AR, Mishmar D.** 2009. Mitochondrial bioenergetics as a  
378 major motive force of speciation. *Bioessays* **31**: 642-50.
- 379 25 **Osada N, Akashi H.** 2012. Mitochondrial-nuclear interactions and accelerated  
380 compensatory evolution: evidence from the primate cytochrome C oxidase complex. *Mol*  
381 *Biol Evol* **29**: 337-46.
- 382 26 **Sloan DB, Triant DA, Wu M, Taylor DR.** 2014. Cytonuclear interactions and relaxed  
383 selection accelerate sequence evolution in organelle ribosomes. *Mol Biol Evol* **31**: 673-  
384 82.
- 385 27 **Barreto FS, Burton RS.** 2013. Evidence for compensatory evolution of ribosomal  
386 proteins in response to rapid divergence of mitochondrial rRNA. *Mol Biol Evol* **30**: 310-  
387 4.
- 388 28 **Gershoni M, Levin L, Ovadia O, Toiw Y, et al.** 2014. Disrupting mitochondrial-nuclear  
389 coevolution affects OXPHOS complex I integrity and impacts human health. *Genome*  
390 *Biol Evol* **6**: 2665-80.
- 391 29 **Hill WG, Robertson A.** 2007. The effect of linkage on limits to artificial selection.  
392 *Genet Res* **89**: 311-36.
- 393 30 **Lynch M, Koskella B, Schaack S.** 2006. Mutation pressure and the evolution of  
394 organelle genomic architecture. *Science* **311**: 1727-30.
- 395 31 **van der Sluis EO, Bauerschmitt H, Becker T, Mielke T, et al.** 2015. Parallel structural  
396 evolution of mitochondrial ribosomes and OXPHOS complexes. *Genome Biol Evol.* Epub  
397 ahead of print.
- 398 32 **Smith DR, Jackson CJ, Reyes-Prieto A.** 2014. Nucleotide substitution analyses of the  
399 glaucophyte *Cyanophora* suggest an ancestrally lower mutation rate in plastid vs  
400 mitochondrial DNA for the Archaeplastida. *Mol Phylogenet Evol* **79**: 380-4.
- 401 33 **Jung PP, Friedrich A, Reisser C, Hou J, et al.** 2012. Mitochondrial genome evolution  
402 in a single protoploid yeast species. *G3 (Bethesda)* **2**: 1103-11.

- 403 34 **Bruns TD, Szaro TM.** 1992. Rate and mode differences between nuclear and  
404 mitochondrial small-subunit rRNA genes in mushrooms. *Mol Biol Evol* **9**: 836-55.
- 405 35 **Lynch M, Sung W, Morris K, Coffey N, et al.** 2008. A genome-wide view of the  
406 spectrum of spontaneous mutations in yeast. *Proc Natl Acad Sci U S A* **105**: 9272-7.
- 407 36 **Sloan DB, Alverson AJ, Wu M, Palmer JD, et al.** 2012. Recent acceleration of plastid  
408 sequence and structural evolution coincides with extreme mitochondrial divergence in the  
409 angiosperm genus silene. *Genome Biol Evol* **4**: 294-306.
- 410 37 **Sloan DB, Oxelman B, Rautenberg A, Taylor DR.** 2009. Phylogenetic analysis of  
411 mitochondrial substitution rate variation in the angiosperm tribe Sileneae. *BMC Evol Biol*  
412 **9**.
- 413 38 **Itoh T, Martin W, Nei M.** 2002. Acceleration of genomic evolution caused by enhanced  
414 mutation rate in endocellular symbionts. *Proc Natl Acad Sci U S A* **99**: 12944-8.
- 415 39 **Marais GA, Calteau A, Tenailon O.** 2008. Mutation rate and genome reduction in  
416 endosymbiotic and free-living bacteria. *Genetica* **134**: 205-10.
- 417 40 **Sung W, Ackerman MS, Miller SF, Doak TG, et al.** 2012. Drift-barrier hypothesis and  
418 mutation-rate evolution. *Proc Natl Acad Sci U S A* **109**: 18488-92.
- 419 41 **Gray MW, Cedergren R, Abel Y, Sankoff D.** 1989. On the evolutionary origin of the  
420 plant mitochondrion and its genome. *Proc Natl Acad Sci U S A* **86**: 2267-71.
- 421 42 **Salmon AB, Richardson A, Perez VI.** 2010. Update on the oxidative stress theory of  
422 aging: does oxidative stress play a role in aging or healthy aging? *Free Radic Biol Med*  
423 **48**: 642-55.
- 424 43 **Lynch M.** 2007. The origins of genome architecture Sunderland, Mass.: Sinauer  
425 Associates.
- 426 44 **Greiner S, Sobanski J, Bock R.** 2015. Why are most organelle genomes transmitted  
427 maternally? *Bioessays* **37**: 80-94.
- 428 45 **Barr CM, Neiman M, Taylor DR.** 2005. Inheritance and recombination of  
429 mitochondrial genomes in plants, fungi and animals. *New Phytol* **168**: 39-50.
- 430 46 **Hausner G.** 2003. Fungal mitochondrial genomes, plasmids and introns. *Applied*  
431 *Mycology and Biotechnology* **3**: 101-31.
- 432 47 **Hoekstra RF.** 2000. Evolutionary origin and consequences of uniparental mitochondrial  
433 inheritance. *Hum Reprod* **15 Suppl 2**: 102-11.



- 434 48 **Hastings IM.** 1992. Population genetic aspects of deleterious cytoplasmic genomes and  
435 their effect on the evolution of sexual reproduction. *Genet Res* **59**: 215-25.
- 436 49 **Hutson V, Law R.** 1993. Four steps to two sexes. *Proc Biol Sci* **253**: 43-51.
- 437 50 **Hurst LD, Hamilton WD.** 1992. Cytoplasmic fusion and the nature of sexes.  
438 *Proceedings of the Royal Society B-Biological Sciences* **247**: 189-94.
- 439 51 **Taylor DR, Zeyl C, Cooke E.** 2002. Conflicting levels of selection in the accumulation  
440 of mitochondrial defects in *Saccharomyces cerevisiae*. *Proc Natl Acad Sci U S A* **99**:  
441 3690-4.
- 442 52 **Sharpley MS, Marciniak C, Eckel-Mahan K, McManus M, et al.** 2012. Heteroplasmy  
443 of mouse mtDNA is genetically unstable and results in altered behavior and cognition.  
444 *Cell* **151**: 333-43.
- 445 53 **de Paula WB, Agip AN, Missirlis F, Ashworth R, et al.** 2013. Female and male gamete  
446 mitochondria are distinct and complementary in transcription, structure, and genome  
447 function. *Genome Biol Evol* **5**: 1969-77.
- 448 54 **de Paula WB, Lucas CH, Agip AN, Vizcay-Barrena G, et al.** 2013. Energy, ageing,  
449 fidelity and sex: oocyte mitochondrial DNA as a protected genetic template. *Philos Trans*  
450 *R Soc Lond B Biol Sci* **368**: 20120263.
- 451 55 **Gladyshev EA, Meselson M, Arkhipova IR.** 2008. Massive horizontal gene transfer in  
452 bdelloid rotifers. *Science* **320**: 1210-3.
- 453 56 **Flot JF, Hespeels B, Li X, Noel B, et al.** 2013. Genomic evidence for ameiotic evolution  
454 in the bdelloid rotifer *Adineta vaga*. *Nature* **500**: 453-7.
- 455 57 **Lane N.** 2009. *Life ascending : the ten great inventions of evolution* New York: W.W.  
456 Norton.
- 457 58 **Hadjivasiliou Z, Pomiankowski A, Seymour RM, Lane N.** 2012. Selection for  
458 mitonuclear co-adaptation could favour the evolution of two sexes. *Proc Roy Soc B* **279**:  
459 1865-72.
- 460 59 **Lane N.** 2011. Mitonuclear match: Optimizing fitness and fertility over generations  
461 drives ageing within generations. *Bioessays* **33**: 860-9.
- 462 60 **Martin W, Koonin EV.** 2006. Introns and the origin of nucleus-cytosol  
463 compartmentalization. *Nature* **440**: 41-5.
- 464 61 **Lane N, Martin W.** 2010. The energetics of genome complexity. *Nature* **467**: 929-34.



- 465 62 **Fisher RA.** 1930. The genetical theory of natural selection Oxford: Oxford University  
466 Press.
- 467 63 **Otto SP, Nuismer SL.** 2004. Species interactions and the evolution of sex. *Science* **304**:  
468 1018-20.
- 469 64 **Budar F, Touzet P, De Paepe R.** 2003. The nucleo-mitochondrial conflict in  
470 cytoplasmic male sterilities revisited. *Genetica* **117**: 3-16.
- 471 65 **Blier PU, Dufresne F, Burton RS.** 2001. Natural selection and the evolution of mtDNA-  
472 encoded peptides: evidence for intergenomic co-adaptation. *Trends Genet* **17**: 400-6.
- 473 66 **Hellberg ME.** 2006. No variation and low synonymous substitution rates in coral  
474 mtDNA despite high nuclear variation. *BMC Evol Biol* **6**: 24.
- 475 67 **Fautin DG.** 2002. Reproduction of Cnidaria. *Canadian Journal of Zoology-Revue*  
476 *Canadienne De Zoologie* **80**: 1735-54.
- 477 68 **Silvertown J.** 2008. The evolutionary maintenance of sexual reproduction: Evidence  
478 from the ecological distribution of asexual reproduction in clonal plants. *International*  
479 *Journal of Plant Sciences* **169**: 157-68.
- 480 69 **Gemmell NJ, Metcalf VJ, Allendorf FW.** 2004. Mother's curse: the effect of mtDNA  
481 on individual fitness and population viability. *Trends Ecol Evol* **19**: 238-44.
- 482 70 **Barreto FS, Pereira RJ, Burton RS.** 2014. Hybrid dysfunction and physiological  
483 compensation in gene expression. *Mol Biol Evol* **32**: 613-22.
- 484 71 **Innocenti P, Morrow EH, Dowling DK.** 2011. Experimental evidence supports a sex-  
485 specific selective sieve in mitochondrial genome evolution. *Science* **332**: 845-8.
- 486 72 **Hussin JG, Hodgkinson A, Idaghdour Y, Grenier JC, et al.** 2015. Recombination  
487 affects accumulation of damaging and disease-associated mutations in human  
488 populations. *Nat Genet* **47**: 400-4.

489  
490  
491

492 **Figure 1.** Mutational meltdown in the mitochondrial DNA (mtDNA) is offset by compensatory  
493 changes in the nuclear DNA, facilitated by recombination associated with sexual reproduction,  
494 providing a mechanism for the origin and maintenance of sexual reproduction. **A:** During  
495 asexual reproduction, mito-nuclear mismatch increases over generations as mtDNA accumulates

496 mutations faster than nucDNA. Here, we envisage the mtDNA mutation rate might ultimately  
497 increase exponentially in the absence of a nuclear compensatory response, once mito-nuclear  
498 mismatch reaches a threshold. This is because the accumulation of mtDNA mutations per se  
499 might act as a catalyzing force for further mutation accumulation (if for instance there is a  
500 positive association between mtDNA mutation numbers and reactive oxygen species production  
501 rates). **B:** With sexual reproduction, organismal viability is restored in the population by  
502 selection for compensatory genotypes in the nucDNA, facilitated by recombination. Red/dotted  
503 lines represent mtDNA, blue/solid lines represent nucDNA, and dashed lines represent a fatal  
504 upper threshold for mito-nuclear mismatch. “Cumulative effective mutations” is shown on the y-  
505 axis, and denotes the effects of these mutations on the phenotype. Even though the absolute  
506 number of mutations in the mitochondrial genome (and nuclear genome) remains the same in  
507 panel (a) and (b), in (b) the mutations are matched by nuclear compensatory adaptations in the  
508 recombined nuclear genome.

509

510 **Figure 2.** A model for early eukaryotic evolution. Under our hypothesis, the evolution of  
511 recombination via sexual reproduction stems from the need to shuffle nuclear genes, as an  
512 inevitable consequence of having mitochondria. We envisage that this was driven by high  
513 mtDNA mutation rates in the early endosymbiotic bacterium that evolved into the  
514 mitochondrion. Following acquisition of the bacterial endosymbiont, the early eukaryote would  
515 have transmitted its endosymbiont vertically (number 1), without recombination, leading to  
516 mutational erosion in the mtDNA. Numbers indicate the general temporal order of other events,  
517 including the evolution of sex, based on our hypothesis. Lightning bolts denote DNA mutations  
518 and different colors represent DNA from different lineages. Circles denote host nucleus and  
519 associated genome, and the eclipses denote mitochondria and their mtDNA.

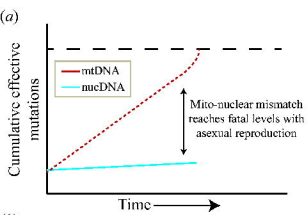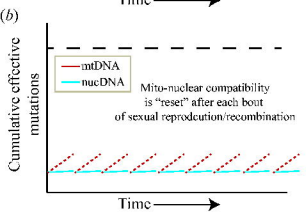

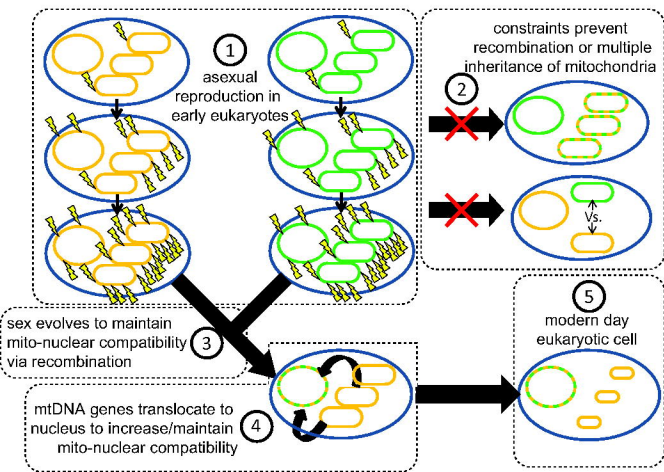

Source: http://biorxiv.org/content/10.1101/019125v1.full.pdf
